# Supplementary material
Source: publisher figshare collection journal article supplement (https://tandf.figshare.com/ndownloader/files/22386180)
Supplement: Supplementary file 1 [file 22386180]

**Supplementary information**

Table S1. Dry matter (in grams ± standard deviation) of the leaf, stem, root and entire plant of ten guava accessions from Kenya after six weeks of salt treatment (n=10 per accession and treatment).

| **Plant part** | **NaCl (mM)** | **Accessions** | | | | | | | | | | |
| --- | --- | --- | --- | --- | --- | --- | --- | --- | --- | --- | --- | --- |
| ELG009 | HOM013 | HOM016 | KIL013 | KIL014 | MER009 | MER011 | MER014 | UAG014 | VIH004 | Mean |
| Leaves | 0 | 3.23**bcd** ± 0.60 | 4.63**a** ± 1.17 | 3.52**abcd** ± 0.96 | 4.88**a**  ± 0.64 | 3.97**abcd** ± 1.32 | 3.01**cd** ± 1.23 | 2.80**d** ± 0.68 | 3.63**abcd** ± 1.21 | 3.94**abc** ± 1.46 | 4.37**abc** ± 1.10 | 3.80 ± 1.22 |
|  | 10/20 | 3.27**bc** ± 1.82 | 5.15**a** ± 1.05 | 4.07**abc** ± 1.05 | 4.63**ab** ± 1.12 | 4.29**abc** ± 0.93 | 2.59**c** ± 1.31 | 2.63**c** ± 1.18 | 3.42**abc** ± 1.43 | 3.90**abc** ± 1.16 | 3.37**abc** ± 1.29 | 3.73 ± 1.44 |
|  | 20/40 | 3.70**a** ± 1.18 | 3.41**a** ± 1.85 | 2.79**a** ± 1.40 | 2.93**a** ± 1.86 | 3.53**a** ± 1.46 | 2.59**a** ± 1.11 | 1.88**a** ± 0.54 | 2.76**a** ± 1.43 | 2.95**a** ± 1.27 | 2.57**a** ± 0.79 | 2.91 ± 1.38 |
|  | 40/80 | 2.66**a** ± 0.83 | 2.23**a** ± 0.94 | 1.60**a** ± 1.27 | 3.41**a** ± 2.43 | 2.02**a** ± 2.04 | 2.00**a** ± 0.87 | 1.95**a** ± 1.34 | 2.59**a** ± 1.12 | 1.89**a** ± 1.12 | 2.83**a** ± 1.40 | 2.32 ± 1.45 |
|  | % change* | -17.6 | -51.8 | -54.5 | -30.1 | -49.1 | -33.6 | -30.4 | -28.7 | -52.0 | -35.2 | -38.9 |
|  | *p*-value** | 0.482 | 0.120 | 0.020 | 0.034 | 0.089 | 0.123 | 0.068 | 0.084 | 0.000 | 0.110 |  |
|  |  |  |  |  |  |  |  |  |  |  |  |  |
| Stems | 0 | 2.69**ab** ± 0.69 | 3.31**a** ± 0.64 | 2.47**ab** ± 0.73 | 3.35**a** ± 0.70 | 3.29**a** ± 1.01 | 2.44**ab** ± 0.35 | 2.09**b** ± 0.51 | 2.46**ab** ± 0.52 | 3.18**a** ± 1.10 | 2.87**ab** ± 0.88 | 2.81 ± 0.83 |
|  | 10/20 | 2.70**ab** ± 0.72 | 3.40**a** ± 0.75 | 2.41**ab** ± 0.91 | 3.10**ab** ± 0.56 | 3.15**ab** ± 0.44 | 2.32**b** ± 0.73 | 2.44**ab** ± 0.68 | 2.75**a**b ± 0.95 | 2.56**ab** ± 0.66 | 2.52**ab** ± 0.73 | 2.73 ± 0.78 |
|  | 20/40 | 2.85**a** ± 0.77 | 2.62**a** ± 0.87 | 2.44**a** ± 0.49 | 2.74**a** ± 0.69 | 3.06**a** ± 0.80 | 2.58**a** ± 0.68 | 2.20**a** ± 0.41 | 2.33**a** ± 0.74 | 2.96**a** ± 0.66 | 2.31**a** ± 0.45 | 2.61 ± 0.70 |
|  | 40/80 | 2.57**a** ± 0.36 | 2.34**ab** ± 0.61 | 2.05**ab** ± 0.43 | 2.57**a** ± 0.29 | 2.64**a** ± 0.62 | 2.30**ab** ± 0.56 | 1.76**b** ± 0.22 | 2.33**ab** ± 0.38 | 2.15**ab** ± 0.58 | 2.34**ab** ± 0.46 | 2.31 ± 0.51 |
|  | % change* | -4.46 | -29.3 | -17.0 | -23.3 | -19.8 | -5.74 | -15.8 | -5.3 | -32.4 | -18.5 | -17.8 |
|  | *p*-value* | 0.183 | 0.111 | 0.054 | 0.021 | 0.039 | 0.116 | 0.096 | 0.092 | 0.065 | 0.005 |  |
|  |  |  |  |  |  |  |  |  |  |  |  |  |
| Roots | 0 | 3.89**a** ± 1.05 | 4.29**a** ± 0.80 | 4.10**a** ± 0.84 | 4.35**a** ± 0.76 | 4.68**a** ± 0.64 | 3.97**a** ± 1.13 | 3.47**a** ± 0.98 | 4.35**a** ± 1.03 | 3.95**a** ± 1.14 | 4.09**a** ± 1.23 | 4.11 ± 0.98 |
|  | 10/20 | 4.32**a** ± 1.00 | 4.70**a** ± 1.02 | 3.88**a** ± 1.07 | 4.94**a** ± 0.60 | 4.24**a** ± 0.60 | 3.91**a** ± 1.25 | 3.62**a** ± 1.51 | 4.25**a** ± 1.68 | 4.33**a** ± 1.36 | 3.89**a** ± 1.21 | 4.21 ± 1.19 |
|  | 20/40 | 4.83**a** ± 1.22 | 4.22**a** ± 1.37 | 3.72**a** ± 1.26 | 4.08**a** ± 0.94 | 4.46**a** ± 1.29 | 3.60**a** ± 1.54 | 3.46**a** ± 0.97 | 3.82**a** ± 1.57 | 3.90**a** ± 0.66 | 3.27**a** ± 0.98 | 3.94 ± 1.24 |
|  | 40/80 | 4.53**a** ± 1.17 | 3.72**ab** ± 1.02 | 3.75**ab** ± 0.94 | 4.40**a** ± 0.73 | 4.88**a** ± 0.76 | 3.76**ab** ± 0.83 | 2.86**b** ± 0.81 | 4.01**ab** ± 1.06 | 4.29**ab** ± 1.07 | 4.36**a** ± 1.57 | 4.06 ± 1.11 |
|  | % change* | 16.5 | -13.3 | -8.54 | 1.15 | 4.27 | -5.29 | -17.6 | -7.82 | 8.61 | 6.60 | -1.22 |
|  | *p*-value** | 0.176 | 0.967 | 0.794 | 0.919 | 0.224 | 0.136 | 0.045 | 0.433 | 0.669 | 0.861 |  |
|  |  |  |  |  |  |  |  |  |  |  |  |  |
| Plant total | 0 | 9.81**abc** ± 1.69 | 12.2**ab** ± 2.27 | 10.1**abc** ± 1.52 | 12.6**a** ± 1.35 | 11.9**ab** ± 2.54 | 9.41**bc** ± 2.43 | 8.35**c** ± 1.58 | 10.4**abc** ± 2.10 | 11.1**abc** ± 2.90 | 11.3**abc** ± 2.77 | 10.7 ± 2.44 |
|  | 10/20 | 10.3**ab** ± 2.96 | 13.3**a** ± 1.65 | 10.4**ab** ± 2.55 | 12.7**a** ± 1.59 | 11.7**ab** ± 1.19 | 8.83**b** ± 2.80 | 8.70**b** ± 2.39 | 10.4**ab** ± 3.79 | 10.8**ab** ± 2.78 | 9.79**ab** ± 2.74 | 10.7 ± 2.82 |
|  | 20/40 | 11.4**a** ± 1.87 | 10.2**ab** ± 3.67 | 8.95**ab** ± 2.12 | 9.75**ab** ± 2.51 | 11.0**ab** ± 2.86 | 8.77**ab** ± 2.66 | 7.54**b** ± 1.19 | 8.91**ab** ± 2.95 | 9.81**ab** ± 1.87 | 8.15**ab** ± 1.75 | 9.46 ± 2.60 |
|  | 40/80 | 9.76**a** ± 1.83 | 8.30**ab** ± 1.85 | 7.41**ab** ± 1.38 | 10.4**a** ± 2.37 | 9.54**ab** ± 2.47 | 8.05**ab** ± 1.98 | 6.58**b** ± 1.99 | 8.92**ab** ± 2.22 | 8.33**ab** ± 2.02 | 9.53**ab** ± 2.81 | 8.68 ± 2.31 |
|  | % change* | -0.51 | -32.0 | -26.6 | -17.5 | -19.8 | -14.5 | -21.2 | -14.2 | -25.0 | -15.7 | -18.9 |
|  | *p*-value** | 0.834 | 0.093 | 0.023 | 0.030 | 0.023 | 0.098 | 0.028 | 0.120 | 0.042 | 0.228 |  |

Different letters in each row indicate significant differences among the 10 accessions at p ≤ 0.05. *Mean percent change between 0 mM NaCl and 40/80 mM NaCl treatments. ***p*-value between 0 mM and 40 mM treatments according to a paired sample t-test. NaCl treatments were doubled after the first three weeks of the experiment.

Table S2. Relative water content (as percent ± standard deviation) of the leaf, stem, root and entire plant of ten guava accessions from Kenya after six weeks of salt treatment (n=10 accessions per treatment).

| **Plant part** | NaCl (mM) | **Accession** | | | | | | | | | |
| --- | --- | --- | --- | --- | --- | --- | --- | --- | --- | --- | --- |
| ELG009 | HOM013 | HOM016 | KIL013 | KIL014 | MER009 | MER011 | MER014 | UAG014 | VIH004 |
| Leaves | 0 | 56.3**a** ± 5.12 | 52.4**a** ± 6.43 | 55.8**a** ± 3.71 | 54.8**a** ± 3.51 | 55.5**a** ± 1.64 | 58.7**a** ± 3.23 | 57.5**a** ± 8.93 | 53.2**a** ± 16.3 | 57.1**a** ± 8.36 | 54.7**a** ± 4.80 |
|  | 10/20 | 57.0**a** ± 7.77 | 53.8**ab** ± 3.60 | 52.7**ab** ± 3.80 | 55.8**ab** ± 2.50 | 55.9**ab** ± 5.03 | 54.1**ab** ± 5.41 | 53.4**ab** ± 2.97 | 50.1**b** ± 5.05 | 55.5**ab** ± 2.80 | 56.9**a** ± 4.33 |
|  | 20/40 | 55.9**a** ± 2.50 | 53.4**a** ± 14.2 | 54.7**a** ± 3.90 | 51.6**a** ± 17.0 | 54.6**a** ± 12.2 | 54.8**a** ± 4.56 | 55.2**a** ± 4.04 | 55.0**a** ± 3.59 | 55.0**a** ± 3.21 | 57.0**a** ± 3.72 |
|  | 40/80 | 52.3**a** ± 4.35 | 46.9**abc** ± 11.0 | 48.3**abc** ± 11.9 | 27.3**c** ± 19.7 | 29.6**b**c ± 19.1 | 50.3**ab** ± 11.4 | 34.7**abc** ± 22.3 | 50.2**ab** ± 9.72 | 48.1**abc** ± 13.3 | 49.6**ab** ± 15.4 |
|  | % change* | -7.2 | -10.4 | -13.5 | -50.2 | -46.7 | -14.4 | -39.6 | -5.6 | -15.8 | -9.4 |
|  | *p*-value** | 0.019 | 0.521 | 0.008 | 0.049 | 0.002 | 0.040 | 0.019 | 0.627 | 0.150 | 0.087 |
|  |  |  |  |  |  |  |  |  |  |  |  |
| Stems | 0 | 53.3**a** ± 4.58 | 47.8**a** ± 9.06 | 54.6**a** ± 14.8 | 54.2**a** ± 8.64 | 57.6**a** ± 9.54 | 46.4**a** ± 11.6 | 49.2**a** ± 10.8 | 54.8**a** ± 10.2 | 50.0**a** ± 12.5 | 51.9**a** ± 6.49 |
|  | 10/20 | 52.9**a** ± 4.89 | 47.5**a** ± 12.8 | 51.7**a** ± 18.4 | 53.9**a** ± 2.99 | 49.8**a** ± 5.78 | 53.2**a** ± 9.95 | 46.6**a** ± 9.81 | 44.9**a** ± 5.23 | 52.7**a** ± 9.24 | 53.0**a** ± 6.44 |
|  | 20/40 | 50.9**a** ± 2.70 | 51.9**a** ± 8.04 | 48.8**a** ± 6.38 | 54.5**a** ± 4.38 | 55.8**a** ± 7.14 | 48.3**a** ± 9.23 | 46.5**a** ± 13.3 | 53.6**a** ± 4.93 | 53.7**a** ± 7.90 | 52.0**a** ± 8.80 |
|  | 40/80 | 52.6**a** ± 6.69 | 51.7**a** ± 7.82 | 50.9**a** ± 10.0 | 54.2**a** ± 9.05 | 58.8**a** ± 8.46 | 47.6**a** ± 17.0 | 54.1**a** ± 5.22 | 52.2**a** ± 12.1 | 51.3**a** ± 6.35 | 50.4**a** ± 13.1 |
|  | % change* | -1.3 | 8.2 | -6.7 | -0.1 | 2.2 | 2.6 | 9.9 | -4.9 | 2.7 | -2.9 |
|  | *p*-value** | 0.584 | 0.913 | 0.900 | 0.654 | 0.589 | 0.237 | 0.060 | 0.438 | 0.646 | 0.854 |
|  |  |  |  |  |  |  |  |  |  |  |  |
| Roots | 0 | 33.6**ab** ± 13.9 | 34.8**ab** ± 10.8 | 30.1**ab** ± 9.23 | 40.4**a** ± 12.5 | 34.4**ab** ± 10.0 | 23.1**b** ± 8.51 | 22.9**b** ± 14.3 | 27.7**ab** ± 12.4 | 32.9**ab** ± 8.98 | 33.6**ab** ± 13.8 |
|  | 10/20 | 29.4**a** ± 10.3 | 38.7**a** ± 10.7 | 35.6**a** ± 12.9 | 33.1**a** ± 10.2 | 31.9**a** ± 11.4 | 27.9**a** ± 9.51 | 31.6**a** ± 15.9 | 28.1**a** ± 15.3 | 34.2**a** ± 7.66 | 33.1**a** ± 12.1 |
|  | 20/40 | 35.7**a** ± 13.2 | 35.2**a** ± 12.5 | 35.7**a** ± 16.3 | 38.2**a** ± 13.4 | 40.7**a** ± 13.8 | 33.7**a** ± 25.8 | 30.7**a** ± 17.2 | 33.7**a** ± 26.0 | 42.0**a** ± 18.8 | 38.8**a** ± 10.8 |
|  | 40/80 | 38.3**a** ± 18.7 | 42.1**a** ± 12.0 | 37.0**a** ± 5.87 | 38.0**a** ± 10.2 | 39.3**a** ± 8.76 | 38.7**a** ± 14.5 | 41.6**a** ± 7.84 | 38.6**a** ± 7.88 | 34.5**a** ± 5.60 | 33.5**a** ± 14.3 |
|  | % change* | 14.1 | 20.8 | 22.8 | -5.9 | 14.3 | 67.5 | 81.6 | 39.4 | 4.6 | -0.2 |
|  | *p*-value** | 0.274 | 0.034 | 0.041 | 0.603 | 0.120 | 0.002 | 0.006 | 0.006 | 0.003 | 0.361 |
|  |  |  |  |  |  |  |  |  |  |  |  |
| Plant total | 0 | 47.7**a** ± 4.83 | 45.0**a** ± 3.47 | 46.8**a** ± 5.72 | 49.8**a** ± 3.37 | 49.2**a** ± 5.48 | 42.7**a** ± 4.80 | 43.2**a** ± 7.23 | 45.2**a** ± 5.84 | 46.7**a** ± 5.97 | 46.7**a** ± 4.21 |
|  | 10/20 | 46.4**a** ± 4.56 | 46.7**a** ± 5.96 | 46.7**a** ± 6.62 | 47.6**a** ± 2.49 | 45.9**a** ± 5.86 | 45.1**a** ± 6.31 | 43.9**a** ± 7.26 | 41.0**a** ± 5.25 | 47.5**a** ± 3.11 | 47.7**a** ± 3.68 |
|  | 20/40 | 47.5**a** ± 4.82 | 46.8**a** ± 6.75 | 46.4**a** ± 6.76 | 48.1**a** ± 6.08 | 50.4**a** ± 4.63 | 45.6**a** ± 9.49 | 44.1**a** ± 6.73 | 47.4**a** ± 8.62 | 50.2**a** ± 6.53 | 49.3**a** ± 5.00 |
|  | 40/80 | 47.7**a** ± 7.04 | 46.9**a** ± 3.84 | 45.4**a** ± 5.56 | 39.8**a** ± 7.34 | 42.6**a** ± 7.43 | 45.5**a** ± 8.76 | 43.5**a** ± 7.10 | 47.0**a** ± 6.78 | 44.6**a** ± 4.73 | 44.5**a** ± 7.43 |
|  | % change* | 0.0 | 4.2 | -3.1 | -20.1 | -13.4 | 6.5 | 0.6 | 3.9 | -4.4 | -4.8 |
|  | *p*-value** | 0.314 | 0.001 | 0.891 | 0.037 | 0.132 | 0.118 | 0.445 | 0.136 | 0.702 | 0.527 |

Different letters in each row indicate significant differences among the 10 accessions at p ≤ 0.05. *Mean percent change between 0 mM NaCl and 40/80 mM NaCl treatments. ***p*-value between 0 mM and 40 mM treatments according to a paired sample t-test. NaCl treatments were doubled after the first three weeks of the experiment.

Table S3. Absolute Na content in mg (mean ± standard deviation) per plant part (leaf, stem and root) and for the whole plant of ten guava accessions from Kenya after six weeks of salt treatment (n=5 per accession and treatment).

| **Plant part** | NaCl (mM) | **Accession** | | | | | | | | | |  |
| --- | --- | --- | --- | --- | --- | --- | --- | --- | --- | --- | --- | --- |
| ELG009 | HOM013 | HOM016 | KIL013 | KIL014 | MER014 | MER009 | MER011 | UAG014 | VIH004 | Mean |
| Leaves | 0 | 1.18**ab** ± 0.36 | 4.27**a** ± 1.67 | 1.67**ab** ± 0.79 | 2.73**ab** ± 1.82 | 4.30**a** ± 1.08 | 1.09**ab** ± 0.99 | 1.38**ab** ± 1.27 | 0.58**b** ± 0.26 | 2.51**ab** ± 3.41 | 1.18**ab** ± 0.89 | 2.09 ± 1.87 |
|  | 10/20 | 17.3**a** ± 18.7 | 14.5**a** ± 14.7 | 7.88**a** ± 1.99 | 30.0**a** ± 15.9 | 23.0**a** ± 13.8 | 2.23**a** ± 1.25 | 3.55**a** ± 4.41 | 20.5**a** ± 34.4 | 9.11**a** ± 7.51 | 2.82**a** ± 2.74 | 13.1 ± 16.4 |
|  | 20/40 | 13.6**bc** ± 12.7 | 19.0**bc** ± 11.1 | 24.6**abc** ± 12.0 | 29.5**ab** ± 16.7 | 44.5**a** ± 15.3 | 4.49**c** ± 3.24 | 11.1**bc** ± 7.04 | 21.8a**bc** ± 6.73 | 11.3**bc** ± 7.90 | 12.8**bc** ± 15.7 | 19.3 ± 15.3 |
|  | 40/80 | 43.4**a** ± 26.0 | 44.6**a** ± 28.8 | 12.1**a** ± 8.37 | 58.0**a** ± 45.6 | 38.7**a** ± 34.8 | 19.6**a** ± 23.1 | 20.2**a** ± 10.3 | 11.9**a** ± 6.60 | 32.2**a** ± 35.6 | 26.8**a** ± 14.5 | 30.7 ± 28.1 |
|  | Fold change* | 37 | 10 | 7 | 21 | 9 | 18 | 15 | 21 | 13 | 23 | 15 |
|  | *p*-value** | 0.023 | 0.040 | 0.038 | 0.053 | 0.096 | 0.153 | 0.018 | 0.019 | 0.111 | 0.015 |  |
|  |  |  |  |  |  |  |  |  |  |  |  |  |
| Stems | 0 | 1.15**a** ± 0.66 | 0.61**a** ± 0.26 | 0.83**a** ± 0.71 | 0.87**a** ± 0.23 | 0.86**a** ± 0.20 | 0.42**a** ± 0.28 | 0.56**a** ± 0.17 | 0.58**a** ± 0.25 | 0.76**a** ± 0.40 | 0.55**a** ± 0.27 | 0.72 ± 0.41 |
|  | 10/20 | 7.09**a** ± 6.29 | 2.38**a** ± 1.69 | 2.30**a** ± 0.79 | 3.17**a** ± 1.27 | 5.16**a** ± 4.73 | 2.87**a** ± 2.59 | 2.37**a** ± 1.02 | 3.34**a** ± 3.82 | 3.15**a** ± 1.67 | 1.38**a** ± 0.35 | 3.32 ± 3.17 |
|  | 20/40 | 3.41**a** ± 1.27 | 3.23**a** ± 2.02 | 5.79**a** ± 3.07 | 8.06**a** ± 6.73 | 4.04**a** ± 2.44 | 1.88**a** ± 0.62 | 5.57**a** ± 3.95 | 4.50**a** ± 2.77 | 3.75**a** ± 1.31 | 2.80**a** ± 1.36 | 4.30± 3.25 |
|  | 40/80 | 12.7**ab** ± 7.11 | 4.26**b** ± 2.33 | 5.43**b** ± 1.93 | 30.1**ab** ± 29.4 | 40.8**a** ± 31.2 | 4.92**b** ± 1.97 | 4.06**b** ± 1.55 | 13.5**ab** ± 10.9 | 15.0**ab** ± 10.4 | 4.00**b** ± 0.83 | 13.5 ± 17.9 |
|  | Fold change* | 11 | 7 | 7 | 35 | 47 | 12 | 7 | 23 | 20 | 7 | 19 |
|  | *p*-value** | 0.024 | 0.023 | 0.008 | 0.091 | 0.046 | 0.008 | 0.006 | 0.056 | 0.040 | 0.001 |  |
|  |  |  |  |  |  |  |  |  |  |  |  |  |
| Roots | 0 | 5.71**a** ± 5.71 | 5.57**a** ± 5.57 | 5.62**a** ± 5.62 | 7.42**a** ± 7.42 | 8.07**a** ± 8.07 | 4.51**a** ± 4.51 | 5.66**a** ± 5.66 | 4.41**a** ± 4.41 | 5.27**a** ± 5.27 | 5.11**a** ± 5.11 | 5.74 ± 2.11 |
|  | 10/20 | 13.3**ab** ± 6.38 | 15.2**ab** ± 5.25 | 10.6**ab** ± 2.38 | 17.7**a** ± 3.96 | 11.4**ab** ± 2.40 | 10.5**ab** ± 5.12 | 9.14**ab** ± 2.73 | 11.1**ab** ± 4.80 | 13.9**ab** ± 4.41 | 7.88**b** ± 2.61 | 12.1 ± 4.75 |
|  | 20/40 | 22.4**a** ± 7.60 | 16.9**abc** ± 6.22 | 9.36**c** ± 3.33 | 15.4**abc** ± 1.83 | 20.3**ab** ± 4.24 | 12.4**abc** ± 4.12 | 14.5**abc** ± 7.90 | 15.7**abc** ± 5.63 | 17.6**abc** ± 4.48 | 10.6**bc** ± 2.00 | 15.5 ± 6.07 |
|  | 40/80 | 33.1**a** ± 1.06 | 18.3**ab** ± 8.02 | 15.7**ab** ± 4.60 | 32.4**ab** ± 15.8 | 30.7**ab** ± 8.85 | 15.8**ab** ± 7.72 | 17.3**ab** ± 8.60 | 14.2**b** ± 4.69 | 28.4**ab** ± 7.84 | 18.7**ab** ± 10.8 | 22.5 ± 10.7 |
|  | Fold change* | 6 | 3 | 3 | 4 | 4 | 4 | 3 | 3 | 5 | 4 | 4 |
|  | *p*-value** | 0.000 | 0.019 | 0.012 | 0.033 | 0.003 | 0.018 | 0.041 | 0.002 | 0.005 | 0.069 |  |
|  |  |  |  |  |  |  |  |  |  |  |  |  |
| Plant total | 0 | 8.04**abc** ± 2.55 | 10.5**abc** ± 1.94 | 8.13**abc** ± 2.57 | 11.0**ab** ± 3.77 | 13.2**a** ± 1.36 | 6.02**bc** ± 1.67 | 7.60**bc** ± 1.22 | 5.57**c** ± 1.71 | 8.55**abc** ± 3.77 | 6.84**bc** ± 2.53 | 8.55 ± 8.55 |
|  | 10/20 | 37.7**ab** ± 27.4 | 32.1**ab** ± 12.8 | 20.7**ab** ± 3.73 | 50.9**a** ± 16.2 | 39.6**ab** ± 10.9 | 15.6**b** ± 8.12 | 15.1**b** ± 6.98 | 34.9**ab** ± 33.6 | 26.2**a** ± 10.3 | 12.1**b** ± 4.36 | 28.5 ± 28.5 |
|  | 20/40 | 39.4**bc** ± 11.6 | 39.1**bc** ± 17.1 | 39.8**bc** ± 13.0 | 52.9**ab** ± 20.9 | 68.9**a** ± 11.0 | 18.8**c** ± 5.68 | 31.1**bc** ± 8.21 | 42.0**bc** ± 4.91 | 32.7**bc** ± 7.02 | 26.1**c** ± 15.3 | 39.1± 39.1 |
|  | 40/80 | 89.1**abc** ± 31.0 | 67.1**bcd** ± 28.6 | 33.2**d** ± 12.0 | 120.4**a** ± 31.5 | 110.2**ab** ± 26.3 | 40.3**cd** ± 27.3 | 41.6**cd** ± 16.1 | 39.7**cd** ± 13.4 | 75.6**abcd** ± 28.1 | 49.5**cd** ± 19.1 | 66.7 ± 66.7 |
|  | Fold change* | 11 | 6 | 4 | 11 | 8 | 7 | 5 | 7 | 9 | 7 | 8 |
|  | *p*-value** | 0.001 | 0.004 | 0.001 | 0.012 | 0.000 | 0.001 | 0.004 | 0.006 | 0.002 | 0.004 |  |
|  |  |  |  |  |  |  |  |  |  |  |  |  |

Different letters in each row indicate significant differences among the 10 accessions at p ≤ 0.05. *Fold change between 0 mM NaCl and 40/80 mM NaCl treatments. ***p*-value between 0 mM and 40 mM treatments according to a paired sample t-test. NaCl treatments were doubled after the first three weeks of the experiment.

Table S4.Concentration of B, Fe, Mn, and Zn (mean values in mg 100g-1 dry weight ± standard deviation) in leaves of guava seedlings as affected by different concentrations of NaCl in irrigation solution six weeks after salt treatment (n=60).

| **NaCl (mM)** | **B** | **Fe** | **Mn** | **Zn** |
| --- | --- | --- | --- | --- |
| 0 | 6.7a ± 1.8 | 26.3a ± 7.7 | 14.9a ± 12.3 | 3.8a ± 0.9 |
| 10/20 | 6.0ab ± 1.6 | 24.1a ± 5.8 | 15.7a ± 10.0 | 3.5a ± 0.8 |
| 20/40 | 6.5ab ± 1.3 | 24.7a ± 8.2 | 19.5a ± 13.4 | 3.4a ± 0.8 |
| 40/80 | 5.9b ± 1.6 | 17.7b ± 7.2 | 19.1a ± 9.2 | 3.7a ± 1.1 |
| Mean | 6.3 ± 1.6 | 23.2 ± 8.0 | 17.3 ± 11.5 | 3.6 ± 1.0 |

Different letters in each column indicate significant differences among salinity levels at p<0.05. NaCl treatments were doubled after the first three weeks of the experiment.
